# Supplementary material for: Preconception Lifestyle and Cardiovascular Health in the Offspring of Overweight and Obese Women
Source: MDPI journal article supplement (doi:10.3390/nu11102446), 2019-10-14
Supplement: s1 [file s1]

**Table S2.** Linear regression analysis of the preconception food score (0-5 points; the higher the more healthy) and offspring cardiovascular health at age 3-6 years.

| Preconception food score (0-5 points) |    |                               |         |
|---------------------------------------|----|-------------------------------|---------|
| Offspring health                      | N  | $\beta$ (95% C.I.) unadjusted | P-value |
| BMI (Z-Score)                         | 43 | 0.02 (-0.27; 0.30)            | 0.90    |
| Waist:height (ratio)                  | 43 | -0.003 (-0.01; 0.01)          | 0.42    |
| SBP (Z-Score)                         | 41 | -0.02 (-0.18; 0.13)           | 0.76    |
| DBP (Z-Score)                         | 41 | -0.12 (-0.27; 0.03)           | 0.10    |
| Fat mass (%)                          | 40 | 1.37 (-1.12; 3.87)            | 0.27    |
| Fat free mass (kg)                    | 40 | 0.30 (-0.36; 0.96)            | 0.36    |
| Pulse wave velocity (m/s)             | 32 | 0.21 (-0.13; 0.54)            | 0.22    |

BMI = body mass index; SBP = systolic blood pressure; DBP = diastolic blood pressure.
