# Supplementary material for: Preconception Lifestyle and Cardiovascular Health in the Offspring of Overweight and Obese Women
Source: MDPI journal article supplement (doi:10.3390/nu11102446), 2019-10-14
Supplement: s1 [file s1]

**Table S1.** Women and offspring characteristics of the participants (N = 46) vs. the non-participants (N = 259).

| <b>Women's characteristics</b>                           |          |                     |          |                         |                |
|----------------------------------------------------------|----------|---------------------|----------|-------------------------|----------------|
|                                                          | <b>N</b> | <b>Participants</b> | <b>N</b> | <b>Non-participants</b> | <b>P-value</b> |
| Age at pregnancy (years; mean; SD)                       | 46       | 30.1 (3.9)          | 254      | 29.8 (4.3)              | 0.69           |
| Caucasian (yes; N; %)                                    | 46       | 44 (95.7)           | 259      | 227 (87.6)              | 0.11           |
| Education level (N; %)                                   | 44       |                     | 246      |                         | 0.29           |
| No education or primary school                           |          | 0                   |          | 10 (4.1)                |                |
| Secondary school                                         |          | 10 (22.7)           |          | 59 (24.0)               |                |
| Intermediate vocational education                        |          | 26 (59.1)           |          | 115 (46.7)              |                |
| Higher vocational education and university               |          | 8 (18.2)            |          | 62 (25.2)               |                |
| Nulliparous (yes; N; %)                                  | 46       | 34 (73.9)           | 258      | 207 (80.2)              | 0.33           |
| Pre-pregnancy BMI (kg/m <sup>2</sup> ; mean; SD)         | 46       | 35.3 (3.4)          | 246      | 35.1 (3.8)              | 0.77           |
| Gestational diabetes (yes; N; %)                         | 46       | 11 (23.9)           | 252      | 44 (17.5)               | 0.30           |
| Smoking at randomization (yes; N; %)                     | 46       | 8 (17.4)            | 255      | 56 (22.0)               | 0.49           |
| Mode of conception (N; %)                                | 46       |                     | 255      |                         | 0.77           |
| Spontaneous                                              |          | 18 (39.1)           |          | 97 (38.0)               |                |
| Ovulation induction                                      |          | 16 (34.8)           |          | 78 (30.6)               |                |
| Intra Uterine Insemination                               |          | 7 (15.2)            |          | 37 (14.5)               |                |
| IVF/ICSI/CRYO                                            |          | 5 (10.9)            |          | 43 (16.9)               |                |
| PCOS (yes; N; %)                                         | 46       | 20 (43.5)           | 258      | 96 (37.2)               | 0.42           |
| Vegetable intake (gram/day)                              | 45       | 121.4               | 228      | 114.3                   | 0.93           |
|                                                          |          | (92.9; 164.3)       |          | (85.7; 171.4)           |                |
| Fruit intake (gram/day)                                  | 45       | 100.0               | 228      | 100.0                   | 0.85           |
|                                                          |          | (57.1; 142.9)       |          | (57.1; 171.4)           |                |
| Sugary drinks (glasses/day)                              | 43       | 0.75                | 214      | 0.65                    | 0.98           |
|                                                          |          | (0.15; 1.61)        |          | (0.20; 1.84)            |                |
| Savoury snacks (handful/week)                            | 43       | 1.8 (0.8; 4.4)      | 219      | 1.9 (0.8; 5.0)          | 0.20           |
| Sweet snacks (portion/week)                              | 43       | 2.5 (0.9; 5.0)      | 220      | 2.5 (0.9; 5.0)          | 0.95           |
| Total moderate-vigorous physical activity (min/week)     | 45       | 480.0               | 228      | 402.5                   | 0.94           |
|                                                          |          | (165.0; 695.0)      |          | (150.0; 960.8)          |                |
| <b>Offspring's characteristics</b>                       |          |                     |          |                         |                |
|                                                          | <b>N</b> | <b>Participants</b> | <b>N</b> | <b>Non-participants</b> | <b>P-value</b> |
| Sex (boys; N; %)                                         | 46       | 22 (47.8)           | 253      | 133 (52.6)              | 0.55           |
| Birth weight (grams; mean; SD)                           | 46       | 3497.4 (507.2)      | 253      | 3390.9 (584.8)          | 0.25           |
| Gestational age at birth (weeks; mean; SD)               | 46       | 39.1 (1.7)          | 254      | 39.0 (2.0)              | 0.79           |
| Exclusively breastfed (months; median; IQR)              | 42       | 0.0 (0.0; 2.0)      | 48       | 0.0 (0.0; 1.0)          | 0.49           |
| Age of the child at time of assessment (years; mean; SD) | 46       | 4.7 (1.0)           | N.A.     | N.A.                    | N.A.           |

SD = standard deviation; BMI = Body Mass Index; IVF = In Vitro Fertilisation; ICSI = Intracytoplasmic Sperm Injection; CRYO = Cryotherapy; min/week = minutes/week; PCOS = polycystic ovary syndrome.
